# Supplementary material for: 3D dendritic hierarchically gradient nanoflowers in situ grown on conductive substrates for efficient hydrovoltaic power generation
Source: Royal Society of Chemistry journal article supplement (doi:10.1039/d4ee00828f), 2024-01-01
Supplement: d4ee00828f4.pdf [file d4ee00828f4.pdf]

## Supporting Information

### 3D Dendritic Hierarchically Gradient Nanoflowers *In Situ* Grown on Conductive Substrates for Efficient Hydrovoltaic Power Generation

Yanan Wang,<sup>a,b</sup> Xianrong Yuan,<sup>a,b</sup> Kun Ni,<sup>b,c</sup> Yuhang Song,<sup>a,b</sup> Xiang Li,<sup>a,b</sup> Xuelian Zeng,<sup>a,b</sup> Beibei Shao<sup>\*a,b</sup> and Baoquan Sun<sup>\*a,b,d</sup>

<sup>a</sup>Jiangsu Key Laboratory for Carbon-Based Functional Materials & Devices, Institute of Functional Nano & Soft Materials (FUNSOM), Soochow University, Suzhou 215123, PR China.

<sup>b</sup>Jiangsu Key Laboratory of Advanced Negative Carbon Technologies, Soochow University, Suzhou 215123, P. R. China.

<sup>c</sup>Key Laboratory for Advanced Carbon Materials and Wearable Energy Technologies of Jiangsu Province, College of Energy, Soochow University, Suzhou 215006, P. R. China.

<sup>d</sup>Macau Institute of Materials Science and Engineering MUST-SUDA Joint Research Center for Advanced Functional Materials Macau University of Science and Technology Macau 999078, P. R. China.

E-mail: [bbshao@suda.edu.cn](mailto:bbshao@suda.edu.cn), [bqsun@suda.edu.cn](mailto:bqsun@suda.edu.cn)

#### **This PDF file includes:**

Note S1

Table S1 to S3

Figure S1 to Figure S22

Movie S1 to S3

## **Supporting Information 1. Numerical simulation of the concentration distribution of hydrogen ions and hydroxides based on 2D nanochannels**

The concentration distribution of ions and surface charge density distribution were both numerically calculated by using the commercial finite-element software package COMSOL (version 5.6) Multiphysics based on the built-in coupled two-dimensional Nernst-Planck-Poisson (PNP) equations. The model is simplified by assuming steady-state conditions, and considering the modeling and computational complexity of three-dimensional models, a 2D model is adopted to explore the concentration distribution of hydrogen ions and hydroxides in nanochannels with different diameters. The active layer is composed of TiO<sub>2</sub> nanoflowers, and the macroporous channels between nanoflowers and mesoporous channels between the blocks that form nanoflowers constitute a rich pore structure. The size of nanoflowers is extremely close and the reaction conditions are the same at different concentrations, the simulation analysis focused on the most obvious difference between the different kinds of nanoflowers, the mesoporous channel of different sizes.

The numerical simulation model based on 2D structure is shown in Fig. 5c. It contains a negatively charged active layer representing the channels between the nanorods blocks that comprise the TiO<sub>2</sub> nanoflowers. Only the pore size varies, and the surface charge density, initial ion concentration, and boundary conditions remain unchanged. And the surface charge was set as negative here.

The PNP equations are recalled below <sup>[1,2]</sup>:

The Nernst-Planck equation describes the fluxes of mobile ions and transport properties of a charged nanochannel:

$$j_i = D_i \left( \nabla c_i + \frac{z_i F c_i}{RT} \nabla \varphi \right) \quad (1)$$

The Poisson equation defines the relationship between the electrical potential and ion concentrations:

$$\nabla^2 \varphi = - \frac{F}{\varepsilon} \sum z_i c_i \quad (2)$$

When the system reaches a stationary regime, the flux must satisfy the following equation:

$$\nabla \cdot j_i = 0 \quad (3)$$

Above  $j_i$ ,  $D_i$ ,  $c_i$ ,  $z_i$ ,  $\varphi$ ,  $\varepsilon$ ,  $F$ ,  $R$ , and  $T$  are the ionic flux, diffusion coefficient, ion concentration, valence number for each species  $i$ , electrical potential, dielectric constant of the solution, faraday constant, universal gas constant, and absolute temperature,

respectively.

The ion flux has the zero normal components at boundaries:

$$n \cdot j_i = 0 \quad (4)$$

The boundary condition for the potential  $\varphi$  on the channel walls is:

$$n \cdot \nabla \varphi = - \frac{\sigma}{\varepsilon} \quad (5)$$

where  $\sigma$  represents the surface charge density. The formation of the electric field is considered to be due to the different surface charge densities of the heterostructure. Therefore, the surface charge density of the TiO<sub>2</sub> nanoflowers is set to be  $-2e^{-5} \text{ C m}^{-2}$ . The initial concentration of the mobile ions (H<sup>+</sup> and OH<sup>-</sup>) in the left reservoir is set to  $10^{-10} \text{ mol L}^{-1}$  and the right reservoirs are set to  $10^{-7} \text{ mol L}^{-1}$ . The surface charge density of the water reservoir is set to  $0 \text{ C m}^{-2}$ . With the given geometry and suitable boundary conditions, the coupled PNP equations are solved with finite-element calculations for the ion concentration distribution.

**Supporting Information 2. Representative electricity output performance of the hydrovoltaic devices**

**Table S1.** Electricity performance of some recently reported hydrovoltaic devices based on low-dimensional nanomaterials with inert electrodes.

| <b>Reference</b>       | <b>Functional materials</b>                              | <b>Short-circuit current density (<math>\mu\text{A}\cdot\text{cm}^{-2}</math>)</b> | <b>Electrodes</b>             |
|------------------------|----------------------------------------------------------|------------------------------------------------------------------------------------|-------------------------------|
| Ref. 1 <sup>[3]</sup>  | TiO <sub>2</sub> nanoparticles                           | 0.12                                                                               | CNT paste                     |
| Ref. 2 <sup>[4]</sup>  | CuO nanowires                                            | 2.49                                                                               | ---                           |
| Ref. 3 <sup>[5]</sup>  | TiO <sub>2</sub> nanowires                               | 8                                                                                  | ITO                           |
| Ref. 4 <sup>[6]</sup>  | Al <sub>2</sub> O <sub>3</sub> nanoparticles             | 0.80                                                                               | Carbon paste                  |
| Ref. 5 <sup>[7]</sup>  | PVDF-SiO <sub>2</sub> -TiO <sub>2</sub> -<br>Glass fiber | 1.45                                                                               | CNT paste                     |
| Ref. 6 <sup>[8]</sup>  | TiO <sub>2</sub> /CNT                                    | 0.25                                                                               | Carbon paste                  |
| Ref. 7 <sup>[9]</sup>  | SiNWs                                                    | 13                                                                                 | CNT mesh paper                |
| Ref. 8 <sup>[10]</sup> | SiNWs                                                    | 22                                                                                 | Graphite/PEDOT:<br>PSS/fabric |
| <b>This work</b>       | TiO <sub>2</sub> nanoflowers                             | 45                                                                                 | CNT mesh paper                |

**Supporting Information 3. Porosity properties of as-prepared 3D hierarchical TiO<sub>2</sub> nanoflowers**

**Table S2.** Porosity properties of as-prepared 3D HTNFs with different precursor concentrations.

| <b>Samples</b> | <b><math>S_{\text{bet}}</math><br/>(<math>\text{m}^2 \cdot \text{g}^{-1}</math>)</b> | <b><math>V_{\text{micro}}</math><br/>(<math>\text{cm}^3 \cdot \text{g}^{-1}</math>)</b> | <b><math>V_{\text{meso}}</math><br/>(<math>\text{cm}^3 \cdot \text{g}^{-1}</math>)</b> | <b><math>V_{\text{total}}</math><br/>(<math>\text{cm}^3 \cdot \text{g}^{-1}</math>)</b> |
|----------------|--------------------------------------------------------------------------------------|-----------------------------------------------------------------------------------------|----------------------------------------------------------------------------------------|-----------------------------------------------------------------------------------------|
| HTNFs-3        | 4.10                                                                                 | 0.042                                                                                   | 0.054                                                                                  | 0.096                                                                                   |
| HTNFs-6        | 6.09                                                                                 | 0.12                                                                                    | 0.047                                                                                  | 0.167                                                                                   |
| HTNFs-9        | 7.45                                                                                 | 0.20                                                                                    | 0.04                                                                                   | 0.24                                                                                    |

**Supporting Information 4. Analysis of variance (ANOVA) results of different influential factors**

**Table S3.** The specific value of the ANOVA results from different factors.

|                        | <b>Mean</b> | <b>Mean SEM</b> | <b>F value</b> | <b>Prob&gt;F</b> |
|------------------------|-------------|-----------------|----------------|------------------|
| Plasma treatment time  | 427.87      | 33.09           | ---            | ---              |
| Thickness              | 514.5       | 20.91           | ---            | ---              |
| Water volume           | 449.1       | 50.44           | ---            | ---              |
| Water temperature      | 524.23      | 27.61           | ---            | ---              |
| Ion concentration      | 529.6       | 13.01           | ---            | ---              |
| Polarity solution type | 504.07      | 23.14           | ---            | ---              |
| <b>Factor</b>          | ---         | ---             | <b>1.92</b>    | <b>0.099</b>     |

\*SEM: standard error of the mean

## Supporting Information 5. Characterization of the top electrode

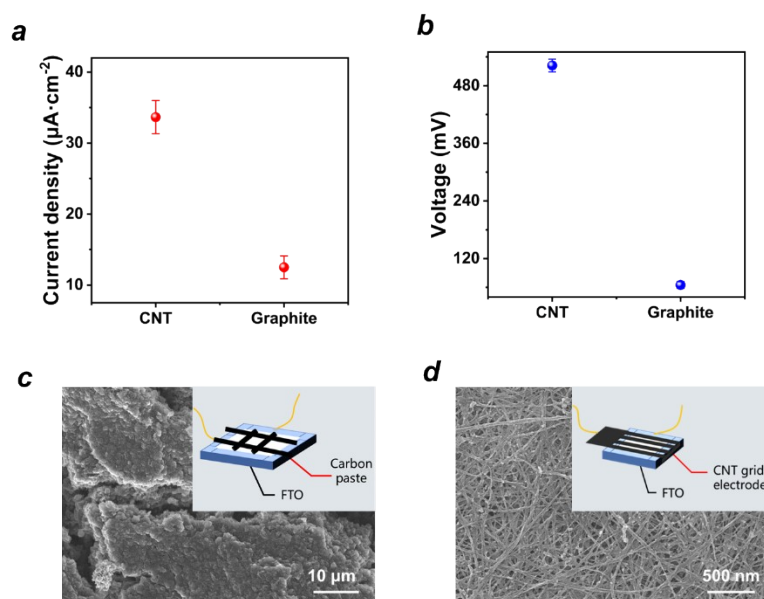

**Fig. S1.** Electricity output and morphology comparison of 3D hierarchical  $\text{TiO}_2$  nano-flowers based WDHPGs with different top electrodes. (a) Short-circuit current density and (b) open-circuit voltage values of corresponding devices. Schematic and scanning electron microscope (SEM) images of (c) grid carbon paste and (d) carbon nanotube (CNT) mesh paper.

**Supporting Information 6. Synthesis process of 3D hierarchical TiO<sub>2</sub> nanoflowers (3D HTNFs)**

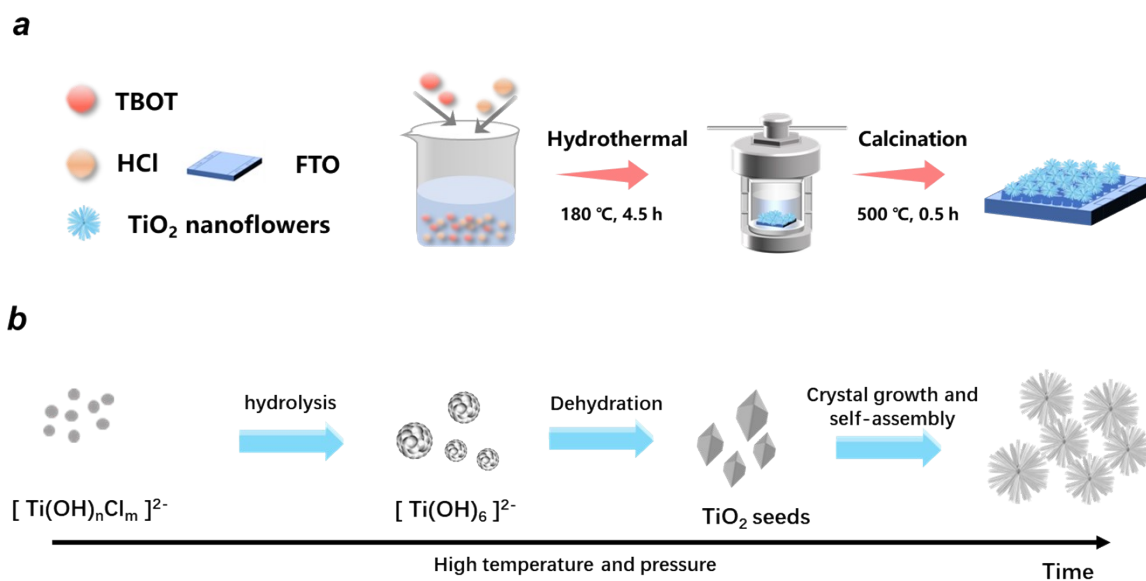

**Fig. S2.** Schematic illustration of the (a) synthesis process of 3D hierarchical TiO<sub>2</sub> nano-flowers that include hydrothermal synthesis and calcination and the (b) detailed formation process of 3D HTNFs, respectively.



**Supporting Information 7. Chemical bonds and functional groups of obtained 3D HTNFs**

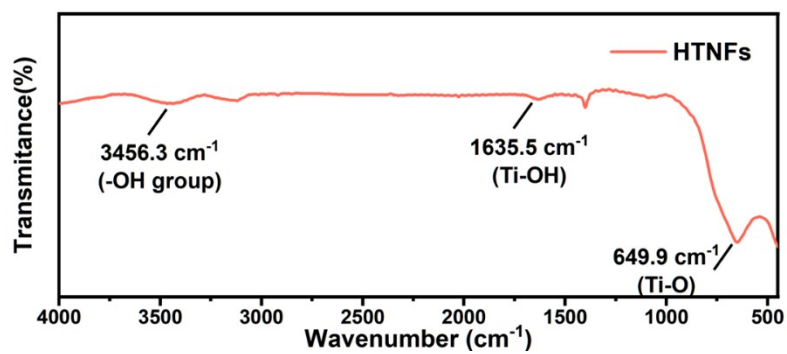

**Fig. S3.** Fourier transform infrared spectroscopy (FTIR) spectrum of 3D hierarchical TiO<sub>2</sub> nanoflowers.

**Supporting Information 8. Surface charge density measurement of obtained 3D HTNFs**

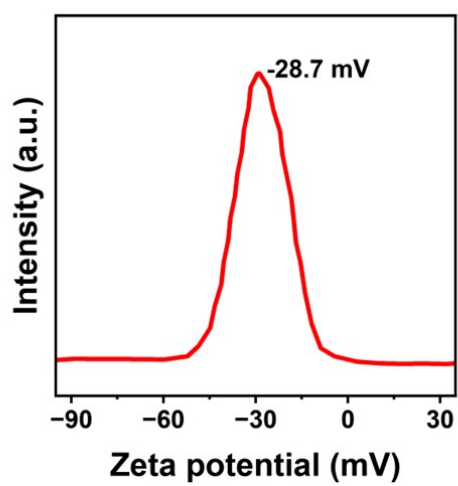

**Fig. S4.** Zeta potential measurement of 3D hierarchical TiO<sub>2</sub> nanoflowers.

**Supporting Information 9. Surface charge density changes under different plasma treatment time**

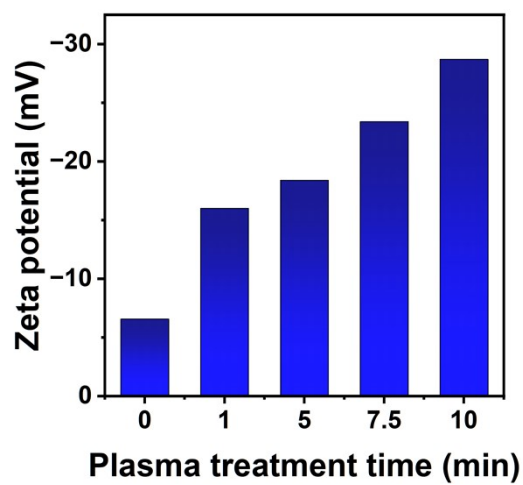

**Fig. S5.** The influence of the plasma treatment time on the Zeta potential of 3D hierarchical TiO<sub>2</sub> nanoflowers.

**Supporting Information 10. Thickness changes with different holding time**

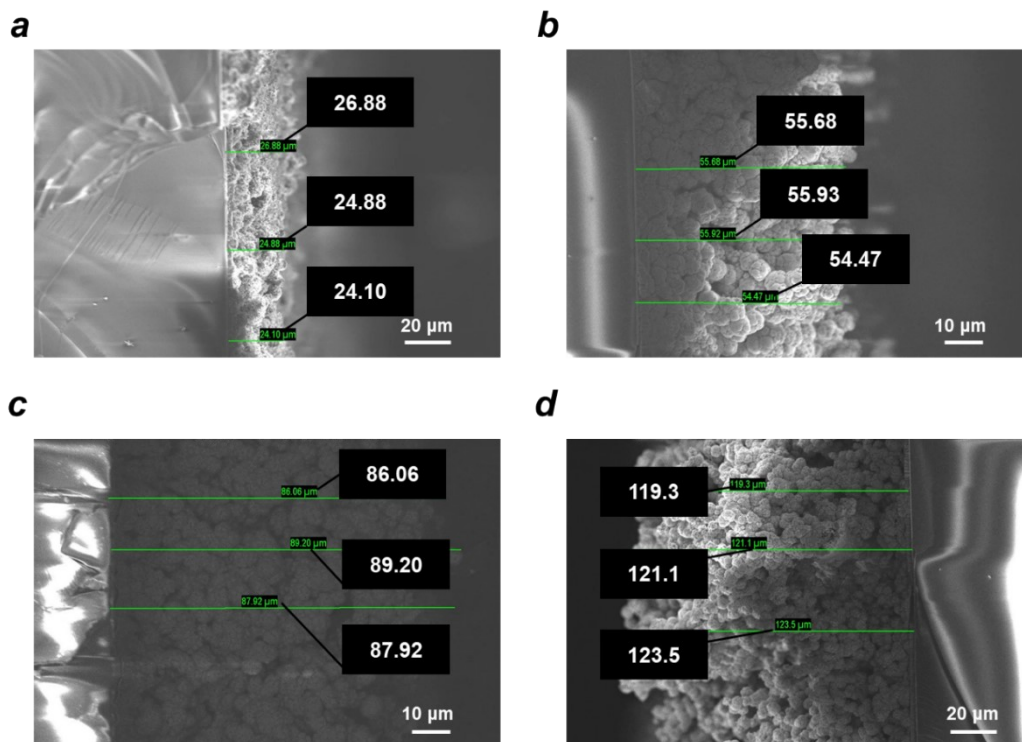

**Fig. S6.** The side-view SEM images of the 3D HTNFs layer with different holding times (a) 1.5 h, (b) 3 h, (c) 4.5 h, and (d) 6 h in the hydrothermal synthesis.

**Supporting Information 11. Electrical performance under different water droplets**

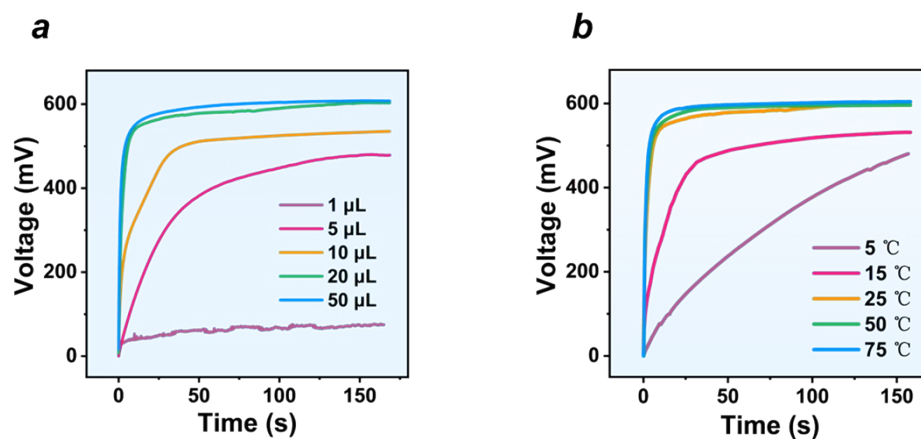

**Fig. S7.** Voltage-time curve of WDHPGs based on 3D hierarchical TiO<sub>2</sub> nanoflowers under dripping water of different (a) volumes and (b) temperatures.

**Supporting Information 12. Response to subsequent water droplet**

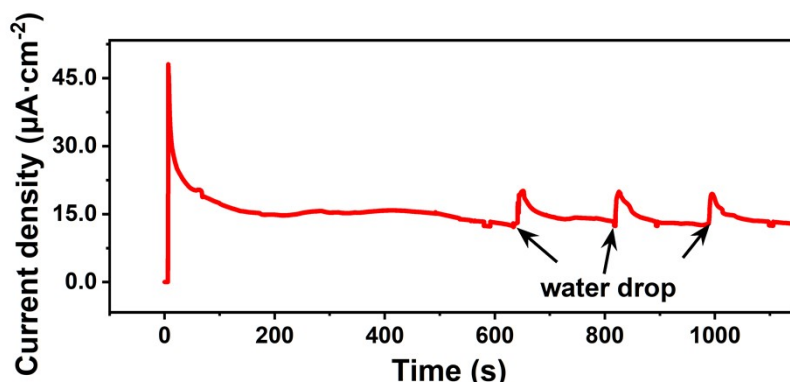

**Fig. S8.** Short-circuit current curve of 3D hierarchical  $\text{TiO}_2$  nanoflowers-based WDHPGs under subsequent water droplet.

**Supporting Information 13. Response to factors that influence the speed of water evaporation/infiltration**

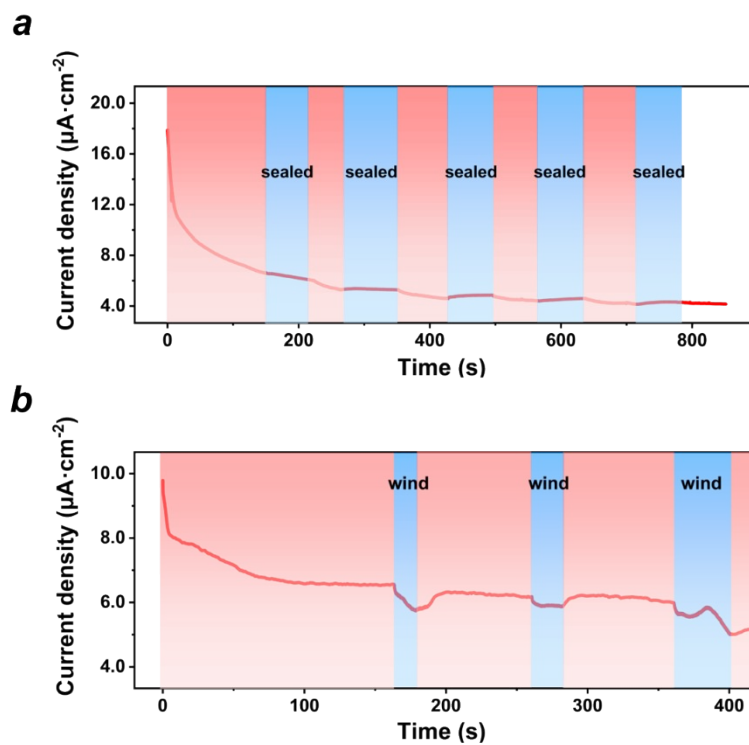

**Fig. S9.** Short-circuit current change of 3D hierarchical  $\text{TiO}_2$  nanoflowers-based WDHPGs (a) in closed (blue bottom) /open (pink bottom) systems and (b) with (blue bottom) /without wind flow (pink bottom).

**Supporting Information 14. ANOVA results of different influential factors**

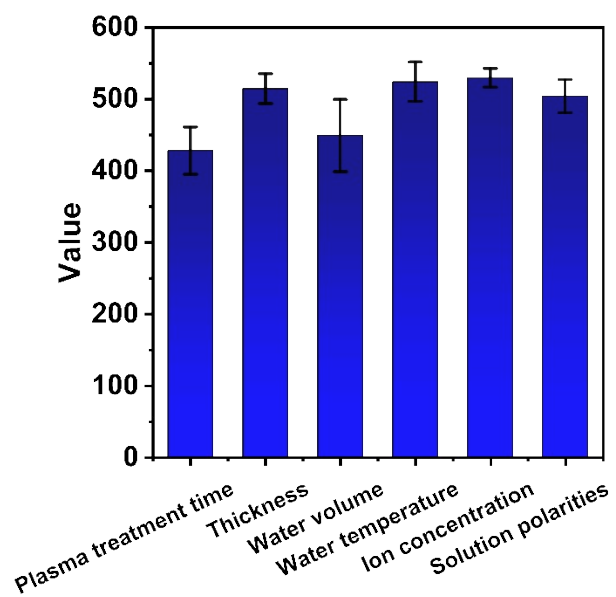

**Fig. S10.** Analysis of variance (ANOVA) results for different factors (mean  $\pm$  standard error of the mean).



## Supporting Information 15. Electrochemical testing of the WDHPGs

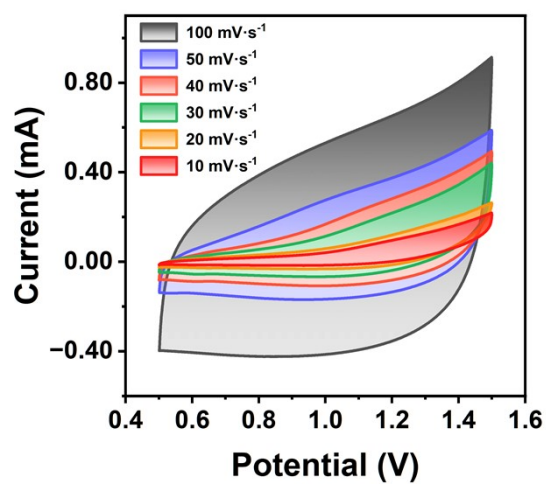

**Fig. S11.** Cyclic voltammetry (CV) scanning curves of 3D hierarchical TiO<sub>2</sub> nanoflowers-based WDHPGs with different scan rates.

**Supporting Information 16. Physical and chemical stability of the 3D hierarchical TiO<sub>2</sub> flowers after times of cycling test**

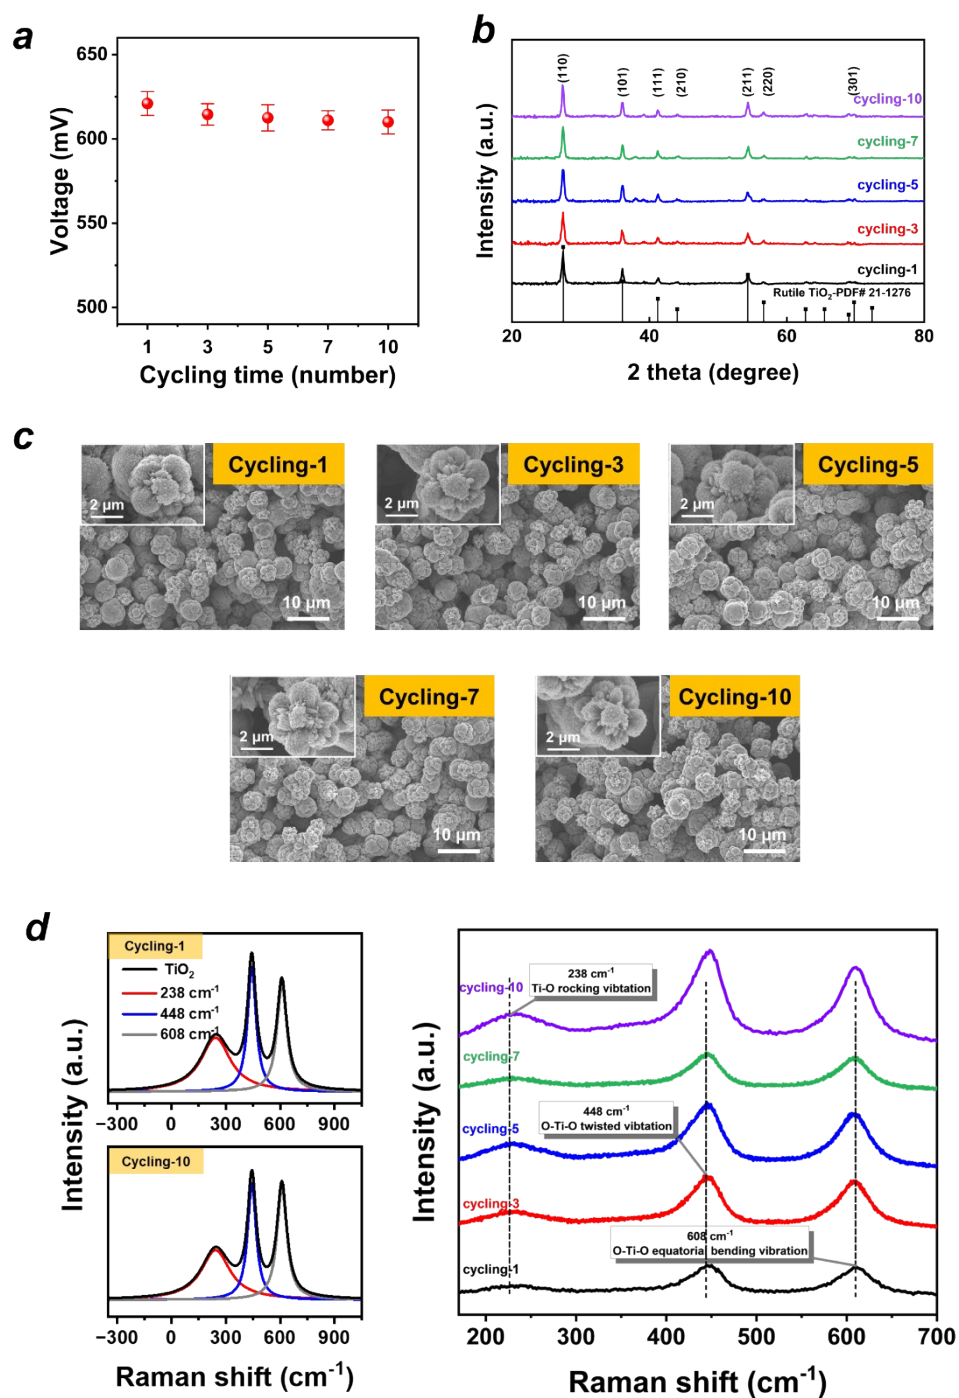

**Fig. S12.** (a) Output voltage, (b) XRD patterns, (c) SEM images, and (d) Raman spectra of HTNFs-based WDHPGs with different cycling times.

**Supporting Information 17. Morphology of 3D HTNFs with different precursor concentrations**

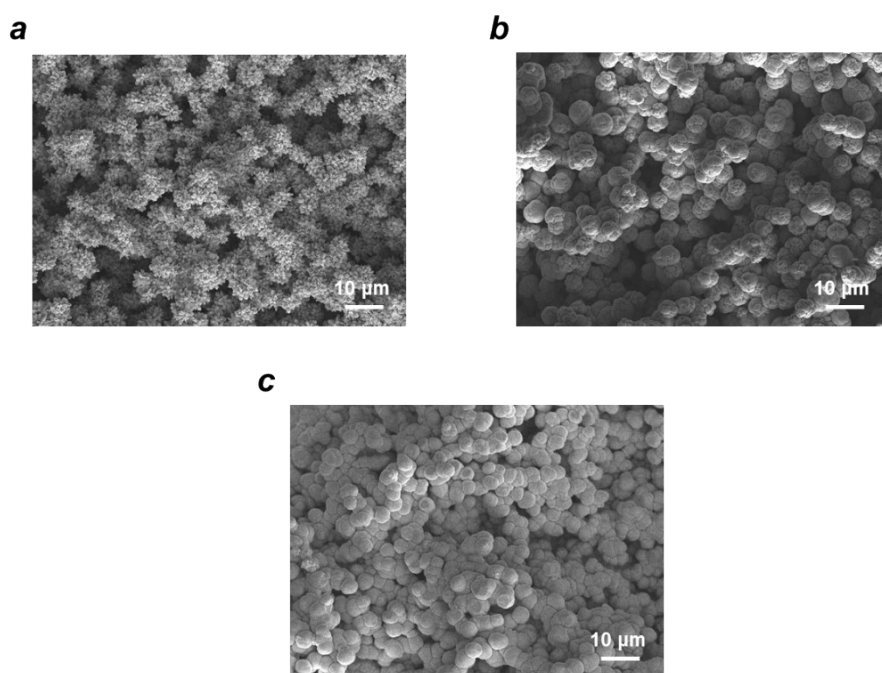

**Fig. S13.** Low-magnification SEM images of 3D hierarchical TiO<sub>2</sub> nanoflowers with a TBOT-HCl ratio of (a) 0.03:4 (HTNFs-3), (b) 0.06:4 (HTNFs-6), and (c) 0.09:4 (HTNFs-9).

**Supporting Information 18. Detailed interface information of 3D HTNFs with different precursor concentrations**

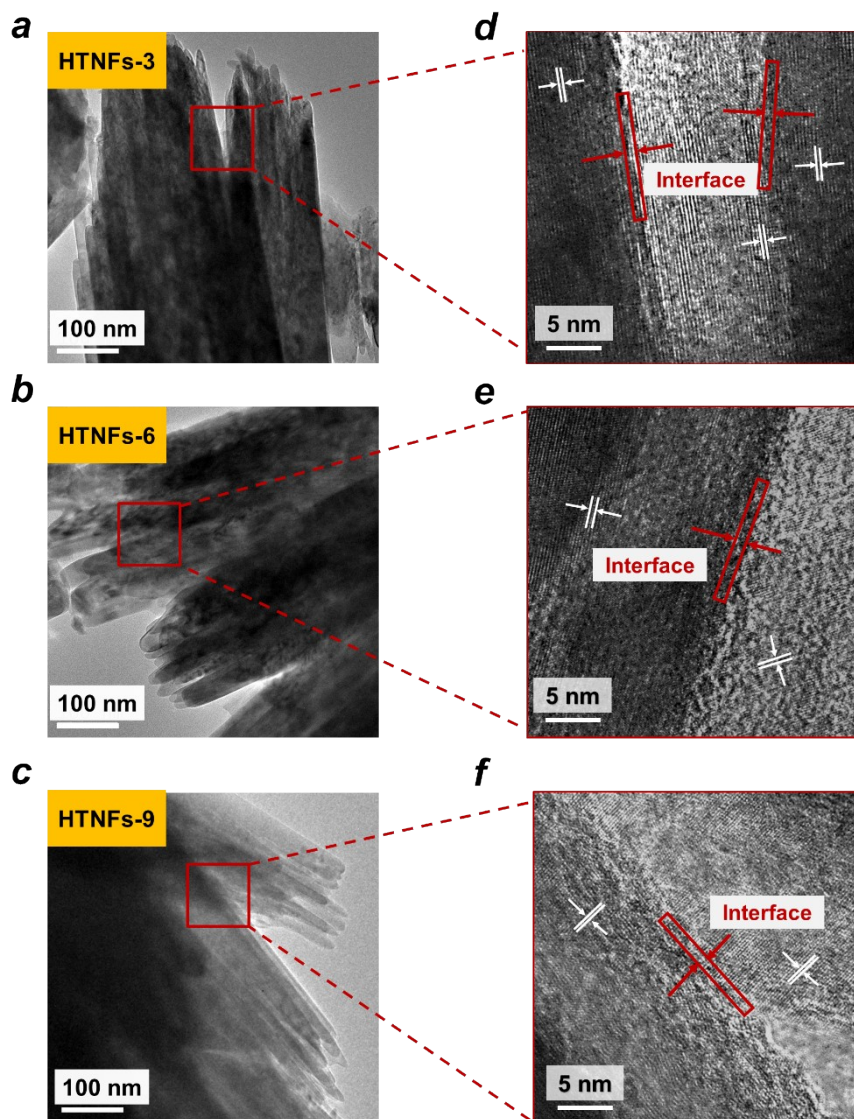

**Fig. S14.** TEM and high-resolution TEM (HRTEM) images of hierarchical TiO<sub>2</sub> nanoflowers with TBOT-HCl: ratio of (a, d) 0.03:4 (HTNFs-3), (b, e) 0.06:10 (HTNFs-6), and (c, f) 0.09:10 (HTNFs-9).

**Supporting Information 19. Pore structure characterization of 3D HTNFs with different precursor concentrations**

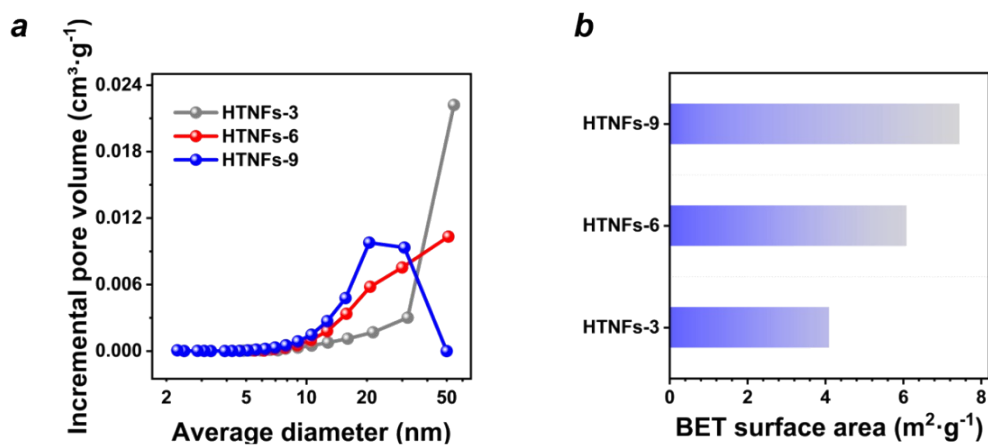

**Fig. S15.** Supplementary pore structure characterization. (a) Incremental pore volume versus pore diameter curve and (b) BET-specific surface area of HTNFs with different TBOT-HCl solution ratios (0.03:4, 0.06:4, 0.09:4).

**Supporting Information 20. Water evaporation rate of HTNFs with different precursor concentrations**

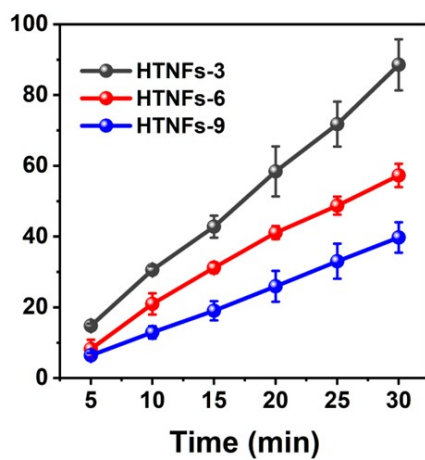

$$\text{Evaporation ratio} = \frac{\text{weight of evaporated water}}{\text{initial weight of water}}$$

**Fig. S16.** Water evaporation rate of 3D HTNFs with different TBOT-HCl solution ratios (0.03:4, 0.06:4, 0.09:4).

**Supporting Information 21. Electrochemical impedance spectra (EIS) of WDHPGs with different precursor concentrations**

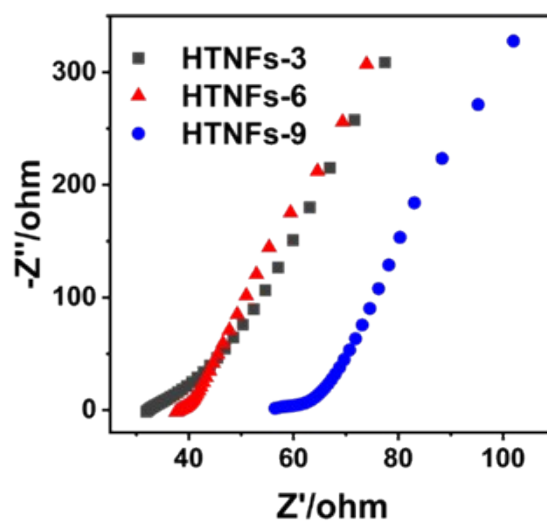

**Fig. S17.** Magnified electrochemical impedance spectra (EIS) of WDHPGs with different TBOT-HCl solution ratios.

**Supporting Information 22. WDHPGs working as a power source**

***a***

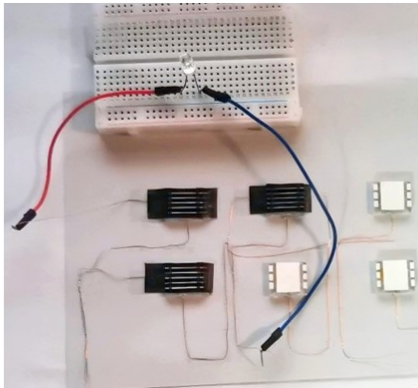

***b***

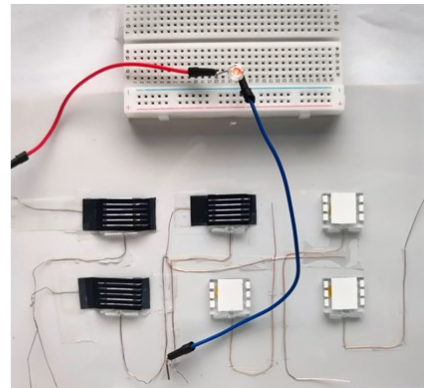

**Fig. S18.** Optical images of the red light-emitting diode (LED) (1.8 V) driven by three hierarchical TiO<sub>2</sub>-based WDHPGs in series (a) before and (b) after water-dripping.



**Supporting Information 23. WDHPGs working as a power source**

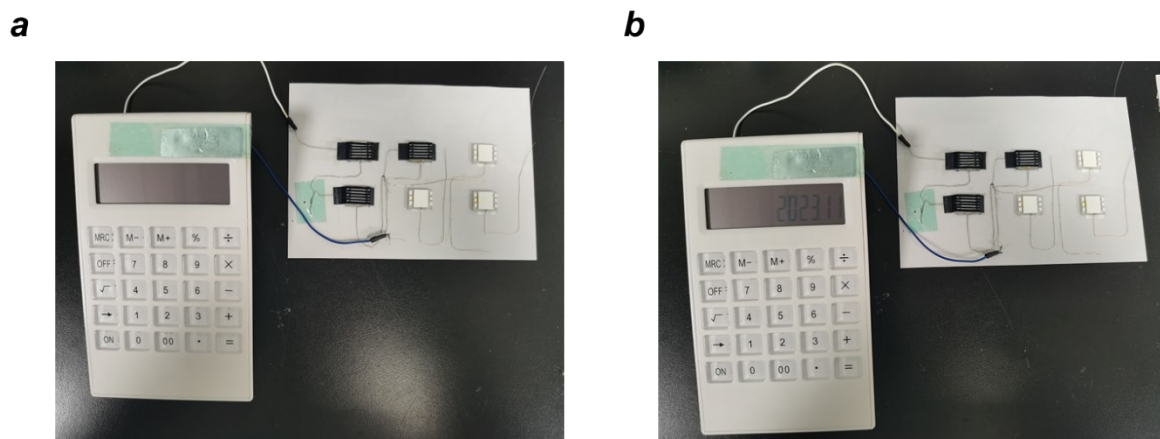

**Fig. S19.** Complete optical images of a commercial digital calculator driven by three hierarchical  $\text{TiO}_2$  nanoflowers-based WDHPGs in series. (a) before and (b) after water-dripping.

**Supporting Information 24. Electricity output performance of the 3D HTNFs-based WDHPGs with UV light illumination**

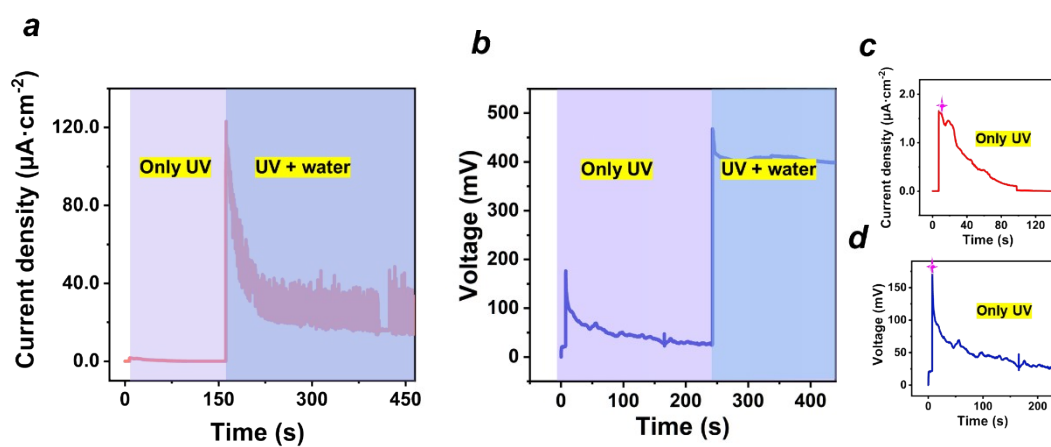

**Fig. S20.** (a)  $I_{sc}$  and (b)  $V_{oc}$  curve of hierarchical TiO<sub>2</sub> nanoflowers-based WDHPGs with UV first and subsequent water dripping. The amplification of peak (c)  $I_{sc}$  and (d)  $V_{oc}$  with UV light excitation only.

**Supporting Information 25. Schematic illustration of the non-contact human-machine interface**

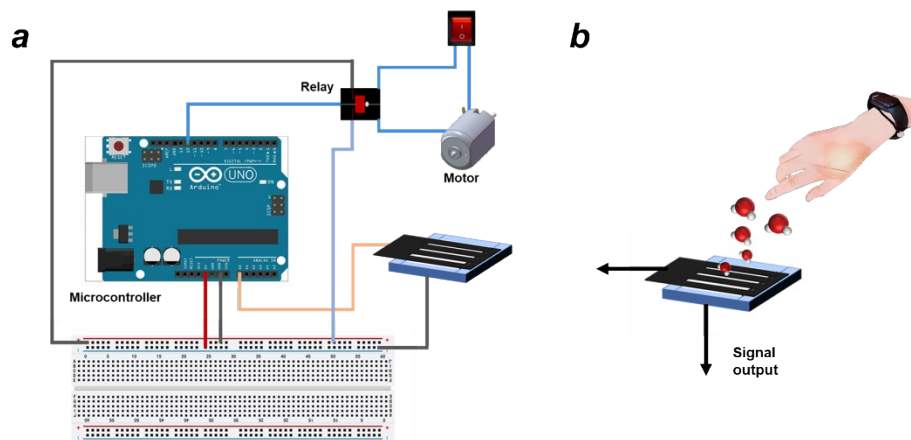

**Fig. S21.** Schematic illustration of (a) the non-contact interaction system that can drive a motor through the humidity signal and (b) the reception and output process of finger humidity.

**Supporting Information 26. Schematic illustration of the self-powered humidity sensing system**

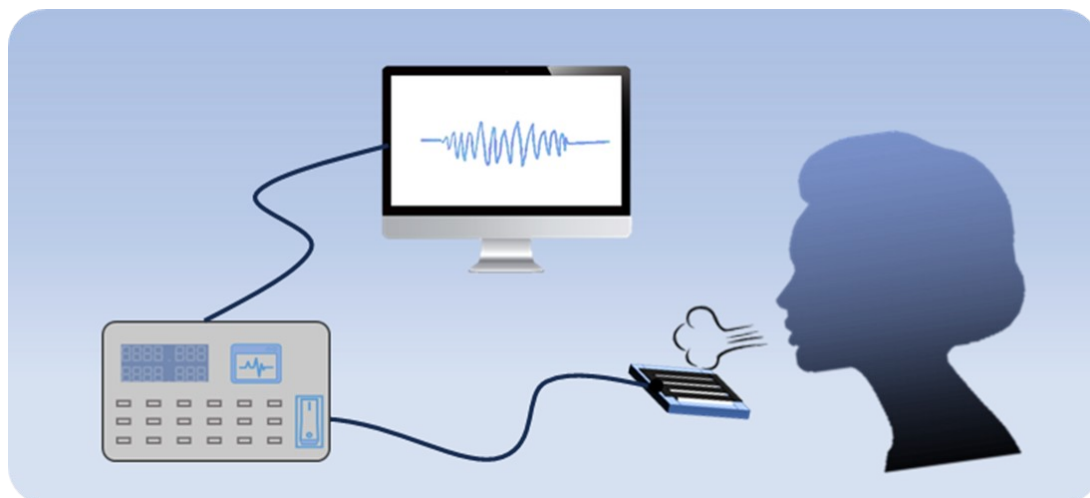

**Fig. S22.** Schematic illustration of the electrical signal measurement system of 3D HTNFs-based self-powered humidity sensors.

## **Supporting Information 27. Demonstration movies**

**Movie S1** Demonstration of the color change of 3D HTNFs surface by dripping phenol red

**Movie S2** Demonstration of the output change of the 3D HTNFs-based WDHPGs with extra UV irradiation

**Movie S3** Demonstration of the non-contact human-machine interface constructed of the 3D HTNFs-based device

## Reference

- [1] L. Ding, D. Xiao, Z. Lu, J. Deng, Y. Wei, J. Caro, H. Wang, *Angew. Chem. Int. Ed.* **2020**, *59*, 8720.
- [2] H. S. White, A. Bund, *Langmuir* **2008**, *24*, 2212.
- [3] T. Zhong, H. Li, T. Zhao, H. Guan, L. Xing, X. Xue, *Journal of Materials Science & Technology* **2021**, *76*, 33.
- [4] Y. Hou, X. Zhang, C. Liu, C. Yin, Z. Yin, *Nano Energy* **2023**, *110*, 108338.
- [5] D. Shen, M. Xiao, G. Zou, L. Liu, W. W. Duley, Y. N. Zhou, *Adv. Mater.* **2018**, *30*, 1705925.
- [6] C. Shao, B. Ji, T. Xu, J. Gao, X. Gao, Y. Xiao, Y. Zhao, N. Chen, L. Jiang, L. Qu, *ACS Appl. Mater. Interfaces* **2019**, *11*, 30927.
- [7] X. Zhao, Z. Xiong, Z. Qiao, X. Bo, D. Pang, J. Sun, J. Bian, *Chemical Engineering Journal* **2022**, *434*, 134671.
- [8] B. Ji, N. Chen, C. Shao, Q. Liu, J. Gao, T. Xu, H. Cheng, L. Qu, *J. Mater. Chem. A* **2019**, *7*, 6766.
- [9] Y. Qin, Y. Wang, X. Sun, Y. Li, H. Xu, Y. Tan, Y. Li, T. Song, B. Sun, *Angew. Chem.* **2020**, *132*, 10706.
- [10] B. Shao, Z. Song, X. Chen, Y. Wu, Y. Li, C. Song, F. Yang, T. Song, Y. Wang, S.-T. Lee, B. Sun, *ACS Nano* **2021**, *15*, 7472.
